# Supplementary material for: Anti-inflammatory Effect of Probiotic Limosilactobacillus reuteri KUB-AC5 Against Salmonella Infection in a Mouse Colitis Model
Source: Frontiers journal article supplement (doi:10.3389/fmicb.2021.716761), 2021-08-23
Supplement: Data_Sheet_1.PDF [file Data_Sheet_1.PDF]

**Supplementary material (Buddhasiri S, et al.)**

**Anti-Inflammatory Effect of Probiotic *Limosilactobacillus reuteri* KUB-AC5 Against *Salmonella* Infection in a Mouse Colitis Model**

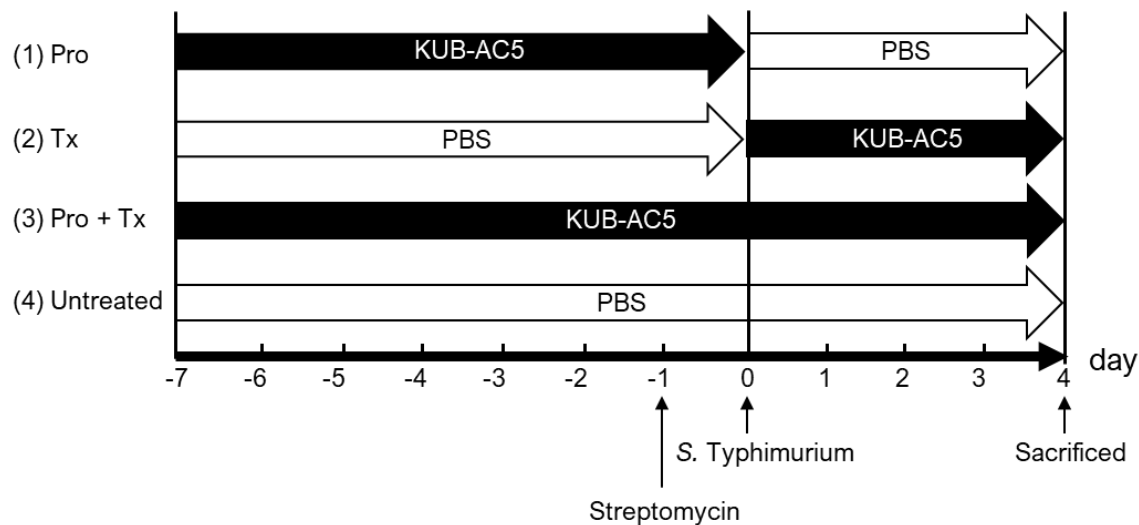

**Figure S1** Schematic illustration of the study design. Female 6-8 week-old C57BL/6 mice were divided into four groups (6-7 mice per group). The first group of mice [(1), prophylactic group, Pro] were orally fed with  $10^9$  cfu AC5 daily for 7 days before STM infection. The second group of mice [(2), therapeutic group, Tx] were fed with  $10^9$  cfu AC5 daily for 4 days after STM infection. The third group of mice [(3), combined group, Pro + Tx] were continuously fed with  $10^9$  cfu AC5 daily for 11 days until sacrificed. The fourth group of mice [(4), untreated group] were fed with sterile PBS. 100  $\mu$ L of (200 mg/mL) streptomycin sulfate was orally fed to mice one day prior to  $10^9$  cfu STM IR715 infection.

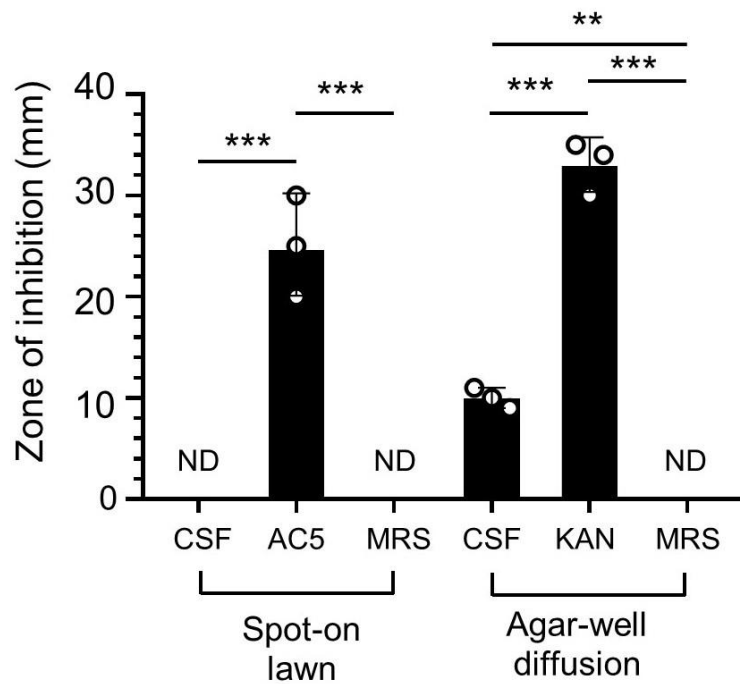

**Figure S2** Diameter of inhibition zone in the spot-on lawn assay and agar well diffusion assay. CSF; Cell-free supernatants, AC5; *L. reuteri* KUB-AC5, KAN; kanamycin as a positive control, MRS; de Man, Rogosa, and Sharpe as a negative control, ND; non detectable. Bars represent geometric means  $\pm$  SDs, \*\* $P < 0.01$  and \*\*\* $P < 0.001$  compared to all other groups.

**Table S1.** Primers used in this study

| Organism                     | Target gene                                                                 | Sequence                                                          | Reference |
|------------------------------|-----------------------------------------------------------------------------|-------------------------------------------------------------------|-----------|
| <i>Mus musculus</i>          | <i>Gapdh</i>                                                                | 5'-TGTAGACCATGTAGTTGAGGTCA-3'<br>5'-AGGTCGGTGTGAACGGATTTG-3'      | (1)       |
|                              | <i>Kc</i>                                                                   | 5'-TGCACCCAAACCGAAGTCAT-3'<br>5'-TTGTCAGAAGCCAGCGTTCAC-3'         |           |
|                              | <i>Nos2</i>                                                                 | 5'-CCAGCCTTGCATCCTCATTGG-3'<br>5'-CCAAACACCAAGCTCATGCGG-3'        |           |
|                              | <i>Ifng</i>                                                                 | 5'- TCAAGTGGCATAGATGTGGAAGAA-3'<br>5'- TGGCTCTGCAGGATTTTCATG-3'   | (2)       |
|                              | <i>Il-6</i>                                                                 | 5'-GCACAACCTCTTTTCTCATTTCCACG-3'<br>5'-GCCTTCCCTACTTCACAAGTCCG-3' | (3)       |
|                              | <i>Zo-1</i>                                                                 | 5'-CAGGGCTCTTTGGAGGAA-3'<br>5'-TACACGATCGTGGCAATAAAC-3'           | (4)       |
| <i>L. reuteri</i><br>KUB-AC5 | A hypothetical<br>AC5-specific<br>antimicrobial<br>peptide encoding<br>gene | 5'-TCGCTCACGGCTGTTAGGACA-3'<br>5'-AGCACTCCACGTTGCCACA-3'          | (5)       |

**Table S2.** Cecal histopathology score criteria (6)

| <b>Score</b> | <b>Neutrophils infiltration</b> | <b>Mononuclear leukocyte infiltration</b> | <b>Submucosal edema</b> | <b>Epithelial damage</b>                                                              | <b>Exudate</b>        |
|--------------|---------------------------------|-------------------------------------------|-------------------------|---------------------------------------------------------------------------------------|-----------------------|
| 0            | No changes<br>(0-5)             | No changes<br>(0-5)                       | No changes              | No changes                                                                            | No changes            |
| 1            | 6-20                            | 6-10                                      | Detectable<br>(<10%)    | Desquamation                                                                          | Slight accumulation   |
| 2            | 21-60                           | 11-20                                     | Mild<br>(10-20%)        | Mild erosion and mild loss of goblet cells / undifferentiated enterocytes hyperplasia | Mild accumulation     |
| 3            | 61-100                          | 21-40                                     | Moderate<br>(21-40%)    | Marked erosion and moderate loss of goblet cells / undifferentiated hyperplasia       | Moderate accumulation |
| 4            | >100                            | >40                                       | Marked<br>(>40%)        | Ulceration and marked loss of goblet cells / undifferentiated hyperplasia             | Marked accumulation   |

## References for the supplementary material

1. Winter SE, Thiennimitr P, Winter MG, Butler BP, Huseby DL, Crawford RW, et al. Gut inflammation provides a respiratory electron acceptor for Salmonella. *Nature*. 2010;467(7314):426-9.
2. Winter SE, Thiennimitr P, Nuccio SP, Haneda T, Winter MG, Wilson RP, et al. Contribution of Flagellin Pattern Recognition to Intestinal Inflammation during Salmonella enterica Serotype Typhimurium Infection. *Infection and immunity*. 2009;77(5):1904-16.
3. Xavier MN, Winter MG, Spees AM, Nguyen K, Atluri VL, Silva TM, et al. CD4<sup>+</sup> T cell-derived IL-10 promotes Brucella abortus persistence via modulation of macrophage function. *PLoS pathogens*. 2013;9(6):e1003454.
4. Inagaki-Ohara K, Sawaguchi A, Suganuma T, Matsuzaki G, Nawa Y. Intraepithelial lymphocytes express junctional molecules in murine small intestine. *Biochem Biophys Res Commun*. 2005;331(4):977-83.
5. Sobanbua S, Dolkittikul S, Nakphaichit M, Keawsompong S, Nitisinprasert S. Antimicrobial peptide presenting potential strain-specific real time polymerase chain reaction assay for detecting the probiotic Lactobacillus reuteri KUB-AC5 in chicken intestine. *Poult Sci*. 2019.
6. Thiennimitr P, Winter SE, Winter MG, Xavier MN, Tolstikov V, Huseby DL, et al. Intestinal inflammation allows Salmonella to use ethanolamine to compete with the microbiota. *Proceedings of the National Academy of Sciences of the United States of America*. 2011;108(42):17480-5.
